# Supplementary material for: Use of Internet Viral Marketing to Promote Smoke-Free Lifestyles among Chinese Adolescents
Source: PLoS One. 2014 Jun 9;9(6):e99082. doi: 10.1371/journal.pone.0099082 (PMC4049615; doi:10.1371/journal.pone.0099082)
Supplement: Questions S1 — Sample quiz questions of the intervention. A sample set of 20 quiz questions translated from the original Chinese question bank. (XLSX) [file pone.0099082.s001.xlsx]

## Sheet: Sheet1
No	Questions	Answer 1	Answer 2	Answer 3	Answer 4	Answer 5	Correct Answer
1	Which of the following substances in cigarette smoke is/are addictive?	Nicotine	Tar	Carbon monoxide	Nicotine and tar	All of the above	Answer 1
2	Which of the following is NOT the effect of tar (a substance found in cigarette smoke)?	Causing cancer	Irritating respiratory tract	Yellowing nails	Addictive	Yellowing teeth	Answer 4
3	How fast could nicotine go into the brain during smoking?	Less than 10 seconds	20 seconds	1 minute	3 minutes	5 minutes	Answer 1
4	Which of the following diseases can be caused by smoking?	Heart disease	Stroke	Atherosclerosis	Aneurysm	All of the above	Answer 5
5	How would smoking damage teeth?	Periodontal disease	Tooth loss	Yellowing teeth	All of the above	None of the above	Answer 4
6	Which of the following problems during pregnancy could be attributed to smoking?	Premature birth	Adverse fetal development	Miscarriage	Increased risk of asthma for the foetus	All of the above	Answer 5
7	Which of the following can be caused by second hand smoking?	Cancer	Heart disease	Respiratory disease	Miscarriage	All of the above	Answer 5
8	How would the amount of harmful substances in smoke directly emitted from smoldering cigarettes compared to that from exhaled from smokers?	The same	Only a half	Twice	More than three times		Answer 4
9	Is it true that smoking cessation can greatly improve smokers' health regardless of age?	Yes, it is true	No, it is not true				Answer 1
10	How many years of life will be, on average, saved for a smoker who quit smoking at 30?	3 years	5 years	8 years	10 years	15 years	Answer 4
11	How many years of life will be, on average, saved for a smoker who quit smoking at 60?	3 years	5 years	8 years	10 years	15 years	Answer 1
12	How would smoking affect the mental / psychological aspect of a person?	Reduced attention	Depression	Sensitive to pressure	Reduced efficiency at work and in school	All of the above	Answer 5
13	How did the profit of resturants in Hong Kong change after enforcing the indoor smoking ban?	The profit increased	The profit decreased	The profit remained the same			Answer 1
14	Is it safer to have menthol cigarettes?	Yes, it is safer	No, it is not				Answer 2
15	What is "sidestream smoke"?	Exhaled smoke from smokers	Material emitted from the smoldering tobacco products between puffs	Smoke emitted at the mouthpiece during puff drawing	Compounds diffused through the wrapper		Answer 2
16	What is the main reason of smoking among female smokers in Hong Kong according to the research of the University of Hong Kong?	Want to establish a smoking image	Social and peer influence	Family influence	Anxiety and depression	Keep fit	Answer 4
17	What is the main reason of smoking among male smokers in Hong Kong according to the research of the University of Hong Kong?	Want to establish a smoking image	Social and peer influence	Family influence	Anxiety and depression	Keep fit	Answer 2
18	On average, how many death of male before retirement are due to smoking?	0.2	0.4	0.6	0.8		Answer 2
19	If A's best friend is a smoker, how can this increase A's chance of smoking?	3 times higher chance	6 times higher chance	13 times higher chance	20 times higher chance		Answer 3
20	On average, by how long will an individual die from smoking according to the WHO?	8 minutes	8 seconds	10 minutes	10 seconds		Answer 2
